# Supplementary material for: Structure–activity relationships of radioiodinated diphenyl derivatives with different conjugated double bonds as ligands for α-synuclein aggregates
Source: Royal Society of Chemistry journal article supplement (doi:10.1039/c6ra02710e), 2016-01-01
Supplement: c6ra02710e1.pdf [file c6ra02710e1.pdf]

**Supporting Information for**

**Structure-Activity Relationships of Radioiodinated Diphenyl Derivatives with Different**

**Conjugated Double Bonds as Ligands for  $\alpha$ -Synuclein Aggregates**

Masahiro Ono<sup>\*,1</sup>, Yuki Doi<sup>1</sup>, Hiroyuki Watanabe<sup>1</sup>, Masafumi Ihara<sup>2</sup>,

Akihiko Ozaki<sup>3</sup>, Hideo Saji<sup>1</sup>

<sup>1</sup>Department of Patho-Functional Bioanalysis, Graduate School of Pharmaceutical Sciences, Kyoto University, 46-29 Yoshida Shimoadachi-cho, Sakyo-ku, Kyoto 606-8501, Japan.

<sup>2</sup>Department of Stroke and Cerebrovascular Diseases, National Cerebral and Cardiovascular Center, 5-7-1 Fujishirodai, Suita-shi, Osaka 565-8565, Japan.

<sup>3</sup>Department of Neurology, Osaka Saiseikai Nakatsu Hospital, 2-10-39 Shibata, Kita-ku, Osaka 530-0012, Japan.

\*To whom correspondence should be addressed. Phone: +81-75-753-4608, Fax: +81-75-753-4568,  
e-mail: ono@pharm.kyoto-u.ac.jp for M. Ono.

Table S1. Biodistribution of radioactivity after intravenous injection of [<sup>125</sup>I]IDP derivatives in normal mice<sup>a</sup>

| Tissue                                             | Time after injection (min) |              |              |              |
|----------------------------------------------------|----------------------------|--------------|--------------|--------------|
|                                                    | 2                          | 10           | 30           | 60           |
| <b>[<sup>125</sup>I]4 ([<sup>125</sup>I]IDP-1)</b> |                            |              |              |              |
| Blood                                              | 2.09 (0.10)                | 1.38 (0.46)  | 1.45 (0.28)  | 0.74 (0.22)  |
| Liver                                              | 10.31 (1.78)               | 10.21 (1.54) | 8.51 (1.08)  | 5.45 (0.87)  |
| Kidney                                             | 5.62 (0.46)                | 5.88 (1.60)  | 10.83 (2.09) | 6.51 (2.07)  |
| Intestine                                          | 1.56 (0.23)                | 4.44 (0.59)  | 9.00 (1.32)  | 9.88 (2.64)  |
| Spleen                                             | 1.70 (0.31)                | 1.07 (0.33)  | 0.83 (0.09)  | 0.42 (0.16)  |
| Pancreas                                           | 3.96 (0.56)                | 1.71 (0.72)  | 0.87 (0.53)  | 1.21 (1.65)  |
| Heart                                              | 4.59 (0.27)                | 1.05 (0.09)  | 1.04 (0.18)  | 1.18 (1.47)  |
| Lung                                               | 5.49 (0.78)                | 10.94 (7.68) | 2.36 (1.00)  | 1.26 (0.27)  |
| Stomach <sup>b</sup>                               | 1.11 (0.38)                | 0.39 (0.07)  | 2.15 (0.66)  | 1.73 (0.50)  |
| Brain                                              | 2.43 (0.10)                | 1.16 (0.20)  | 0.33 (0.07)  | 0.19 (0.05)  |
| <b>[<sup>125</sup>I]8 ([<sup>125</sup>I]IDP-2)</b> |                            |              |              |              |
| Blood                                              | 6.25 (1.60)                | 2.78 (0.78)  | 2.37 (0.20)  | 1.59 (0.47)  |
| Liver                                              | 29.94 (4.39)               | 25.93 (5.78) | 24.36 (4.02) | 18.53 (5.19) |
| Kidney                                             | 9.97 (0.91)                | 5.68 (0.96)  | 6.75 (0.99)  | 5.24 (1.76)  |
| Intestine                                          | 1.91 (0.19)                | 5.17 (1.34)  | 7.20 (1.20)  | 18.91 (8.94) |
| Spleen                                             | 6.19 (1.62)                | 6.56 (0.90)  | 7.86 (1.59)  | 5.88 (2.10)  |
| Pancreas                                           | 3.38 (0.21)                | 2.82 (0.82)  | 1.36 (0.21)  | 0.96 (0.32)  |
| Heart                                              | 7.70 (2.08)                | 3.78 (1.22)  | 1.89 (0.28)  | 1.50 (0.52)  |

|                                                     |              |              |              |              |
|-----------------------------------------------------|--------------|--------------|--------------|--------------|
| Lung                                                | 9.48 (0.80)  | 4.47 (0.85)  | 3.11 (0.59)  | 2.17 (0.49)  |
| Stomach <sup>b</sup>                                | 0.67 (0.06)  | 1.15 (0.54)  | 3.01 (1.42)  | 3.10 (2.60)  |
| Brain                                               | 0.81 (0.11)  | 1.00 (0.30)  | 0.64 (0.12)  | 0.38 (0.13)  |
| <b>[<sup>125</sup>I]12 ([<sup>125</sup>I]IDP-3)</b> |              |              |              |              |
| Blood                                               | 13.34 (1.20) | 4.86 (0.81)  | 3.26 (0.42)  | 2.45 (0.38)  |
| Liver                                               | 33.84 (2.90) | 35.07 (1.82) | 27.16 (2.97) | 16.13 (1.38) |
| Kidney                                              | 8.57 (0.96)  | 7.41 (0.67)  | 4.21 (0.24)  | 4.19 (0.57)  |
| Intestine                                           | 1.03 (0.20)  | 2.82 (0.67)  | 9.15 (1.73)  | 16.39 (2.52) |
| Spleen                                              | 6.99 (1.46)  | 8.83 (1.23)  | 11.59 (3.49) | 3.69 (0.67)  |
| Pancreas                                            | 1.91 (0.24)  | 2.58 (0.28)  | 2.10 (0.21)  | 1.54 (0.22)  |
| Heart                                               | 10.68 (3.08) | 8.38 (1.25)  | 3.21 (0.67)  | 1.95 (0.30)  |
| Lung                                                | 17.27 (2.66) | 7.52 (2.02)  | 4.08 (0.32)  | 2.75 (0.48)  |
| Stomach <sup>b</sup>                                | 0.51 (0.07)  | 0.86 (0.14)  | 1.79 (0.98)  | 1.16 (0.56)  |
| Brain                                               | 0.56 (0.04)  | 0.58 (0.06)  | 0.57 (0.06)  | 0.66 (0.06)  |
| <b>[<sup>125</sup>I]16 ([<sup>125</sup>I]IDP-4)</b> |              |              |              |              |
| Blood                                               | 14.01 (1.17) | 4.38 (0.62)  | 2.92 (0.22)  | 2.62 (0.30)  |
| Liver                                               | 42.39 (4.28) | 51.67 (8.52) | 43.98 (1.44) | 26.79 (1.75) |
| Kidney                                              | 6.47 (0.68)  | 5.94 (0.84)  | 5.36 (0.60)  | 4.14 (0.39)  |
| Intestine                                           | 0.86 (0.05)  | 1.80 (0.50)  | 4.55 (1.07)  | 10.34 (1.69) |
| Spleen                                              | 9.71 (1.82)  | 25.37 (8.05) | 17.39 (6.21) | 6.69 (1.93)  |
| Pancreas                                            | 1.44 (0.52)  | 2.03 (0.40)  | 2.01 (0.43)  | 1.99 (0.27)  |
| Heart                                               | 9.22 (1.94)  | 5.88 (1.05)  | 4.53 (1.16)  | 3.02 (0.64)  |
| Lung                                                | 18.99 (2.22) | 8.99 (1.80)  | 4.82 (0.27)  | 3.44 (0.58)  |
| Stomach <sup>b</sup>                                | 0.37 (0.07)  | 0.64 (0.13)  | 1.46 (0.37)  | 1.81 (0.64)  |

|       |             |             |             |             |
|-------|-------------|-------------|-------------|-------------|
| Brain | 0.45 (0.03) | 0.30 (0.03) | 0.38 (0.04) | 0.42 (0.04) |
|-------|-------------|-------------|-------------|-------------|

<sup>a</sup> Each value represents the mean (SD) for 5 animals.

<sup>b</sup> Expressed as % injected dose per organ.

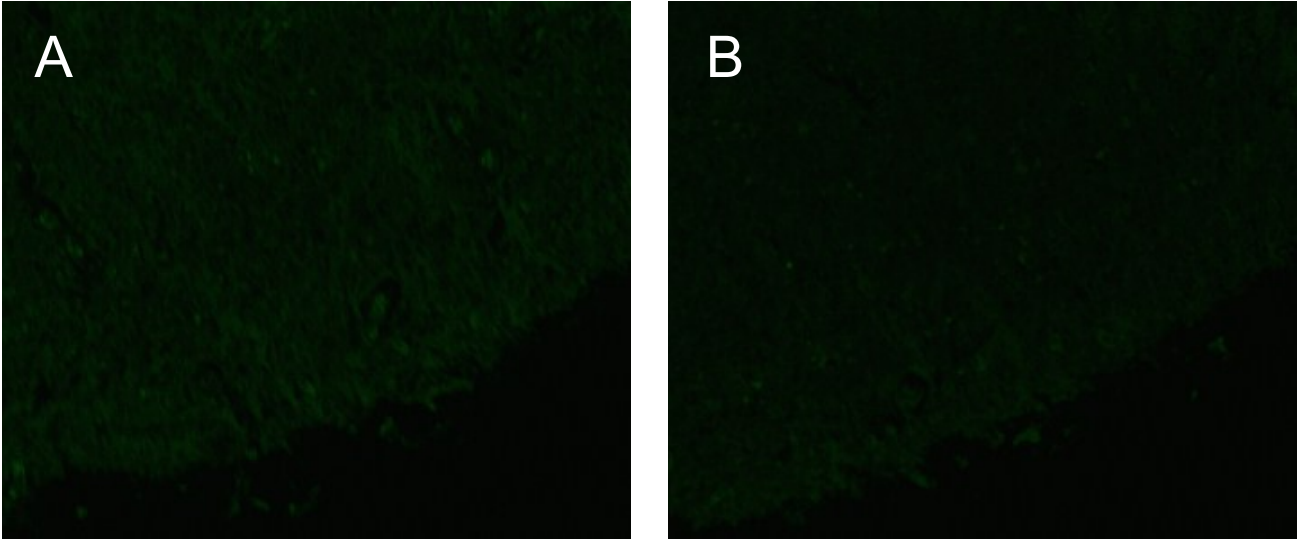

Figure S1. Fluorescent staining of IDP-1 (A) and IDP-2 (B) in brain sections from a PD patient. No marked fluorescence was observed in the brain sections.
